# Supplementary material for: Effects of NO x and SO 2 on the Secondary Organic Aerosol Formation from Photooxidation of α-pinene and Limonene
Source: Copernicus journal article supplement (doi:10.5194/acp-2017-294), 2017-04-04
Supplement: Supplementary file [file acp-2017-294-AC1-supplement.pdf]

1 **Responses to Referee # 1**

2 We thank the reviewer for the careful review of our manuscript. The comments and suggestions are  
3 greatly appreciated. All the comments have been addressed. In the following, please find our  
4 responses to the comments one by one and the corresponding revisions made to the manuscript. The  
5 original comments are shown in italics. The revised parts of the manuscript are highlighted.

6 **Anonymous Referee #1**

7 Received and published: 26 April 2017

8 *This manuscript describes the competing roles of NO<sub>x</sub> and SO<sub>2</sub> on SOA formation of  $\alpha$ -pinene and*  
9 *limonene. The ability of SO<sub>2</sub> to enhance seed aerosol surface area appears to be a dominant factor,*  
10 *and that enhancing seed aerosol reduces the NO<sub>x</sub> suppression of SOA yields, at least in some*  
11 *monoterpenes. The authors use their AMS data to determine the role of organic nitrates in SOA, and*  
12 *find that organic nitrates account for a substantial fraction of the SOA mass. Overall, this is an*  
13 *interesting piece of work, and warrants publication in the ACP following some revision.*

14 *Major Comments*

15 *The nature of the experimental design was not so much to look at the impact of SO<sub>2</sub> – but to look at*  
16 *the role of a sulfate seed aerosol. From the manuscript, my interpretation is that the SO<sub>2</sub> additions*  
17 *were used to nucleate (inorganic) seed aerosol. Was there any SO<sub>2</sub> left over to impact VOC oxidation?*  
18 *It is not clear to me if the SO<sub>2</sub> additions really paralleled the NO<sub>x</sub> additions, because the*  
19 *experimental design was different. That’s not to say that these aren’t valuable experiments that add to*  
20 *the literature! I merely question whether this was truly an ‘SO<sub>2</sub> addition’ rather than a ‘sulfate*  
21 *aerosol addition’ to VOC oxidation experiments.*

22 **Response:**

23 We thank the reviewer for the supporting remarks.

24 In the experiments with SO<sub>2</sub> added, SO<sub>2</sub> concentration decreased slowly and most of SO<sub>2</sub> was still left  
25 (typically around 8 ppb) at the end of an experiment because of the low reactivity of SO<sub>2</sub> with OH  
26 ( $\sim 2 \times 10^{-12}$  molecules<sup>-1</sup> cm<sup>3</sup> s<sup>-1</sup> at 298 K). SO<sub>2</sub> time series in a typical experiment are shown in a newly  
27 added figure (Fig. S2). Therefore, the experiments with SO<sub>2</sub> not only included the effect of sulfate  
28 formed from SO<sub>2</sub> oxidation as seed but also the potential role of SO<sub>2</sub> on VOC oxidation, although the  
29 role on VOC oxidation turned out to be likely not significant. We have added the follow sentence in  
30 the revised manuscript to clarify this point.

31 “SO<sub>2</sub> concentration decayed slowly in the experiments with SO<sub>2</sub> added and most of the SO<sub>2</sub> was still  
32 left (typically around 8 ppb from initial 15 ppb) at the end of an experiment due to its low reactivity  
33 with OH. Typical SO<sub>2</sub> time series in high SO<sub>2</sub> experiments are shown in Fig S2.”

34 Although the SO<sub>2</sub> addition did not exactly parallel NO<sub>x</sub> addition, by adding SO<sub>2</sub> and inducing  
35 nucleation first, we can make sure that in high SO<sub>2</sub> conditions enough nucleated particles were  
36 represent for the oxidation products to condense on once VOC oxidation started. Otherwise, it would  
37 be unclear whether the low SOA yield at high NO<sub>x</sub> was due to missing nucleation or lack of  
38 condensable products. In this way, we can somewhat differentiate the role of promoting nucleation  
39 from the role of affecting the condensable products from VOC oxidation.

40 In the revised manuscript, we have added the following sentence.

41 “Adding SO<sub>2</sub> first and initializing nucleation by SO<sub>2</sub> photooxidation ensured that enough nucleating  
42 particles were present when VOC oxidation started.”

43 The effect of SO<sub>2</sub> on VOC oxidation is provided in the response to one similar comment below (Pg. 7,  
44 lines 205-209).

45 *SOA yield is influenced strongly by OA mass. The authors plot SOA yield versus OH dose, which is*  
46 *certainly a useful figure to see – but it is hard to compare the SOA yields if the SOA mass has not*  
47 *been accounted for. The authors need to also show SOA yield versus OA mass so that the readers can*  
48 *contrast the relationships to other studies. It would be useful to compare the SOA yields to other*  
49 *studies: how do the yield values compare to other measurements of OH oxidation of a-pinene? This*  
50 *will allow readers to place the studies in context.*

51 **Response:**

52 We have accepted the reviewer’s suggestion. In the revised manuscript, we have added a figure of  
53 SOA yield versus OA mass concentration (Fig. S8 and S9) and compared the SOA yield in this study  
54 to previous studies. We have also discussed other factors influencing SOA yield.

55 *The results of SO<sub>2</sub> and NO<sub>x</sub> effects on SOA yield are consistent with the Sarrafzadeh and Eddingsaas*  
56 *studies, which found that the presence of seed aerosol suppresses the ‘NO<sub>x</sub> effect’ on SOA yield.*  
57 *However, they contradict previous studies (e.g. Ng et al. 2007, Presto et al. 2005). The authors need*  
58 *to do a better job of contrasting their studies – they attribute the difference to a vague collection of*  
59 *parameters (e.g. NO:NO<sub>2</sub> ratio, OH concentrations, etc.). It would be extremely helpful if the authors*  
60 *could synthesize the information (i.e. put numbers on those parameters) to help readers understand*  
61 *the differences in experimental conditions across the studies. A table would be particularly helpful.*

62 **Response:**

63 We have accepted the reviewer’s suggestions. In the revised manuscript, we have added one table  
64 summarizing the reaction conditions of previous studies (Table. S2) and elaborated the discussion  
65 related to the difference between our study and previous studies.

66 “...The reaction conditions of this study often differ from those described in the literature (see  
67 Table S2).

68 The difference in these conditions can result in both different apparent dependence on specific  
69 parameters and the varied SOA yield. For example, SOA yield from  $\alpha$ -pinene photooxidation at low  
70  $\text{NO}_x$  in this study appeared to be much lower than that in Eddingsaas et al. (2012a). The difference  
71 between the SOA yield in this study and some of previous studies and between the values in the  
72 literature can be attributed to several reasons: 1)  $\text{RO}_2$  fates may be different. For example, in our study  
73 at low  $\text{NO}_x$ ,  $\text{RO}_2+\text{NO}$  account for a large fraction of  $\text{RO}_2$  loss while in Eddingsaas et al. (2012a)  
74  $\text{RO}_2+\text{HO}_2$  is the dominant pathway of  $\text{RO}_2$  loss. This difference in  $\text{RO}_2$  fates may affect oxidation  
75 products distribution. 2) The organic aerosol loading of this study is much lower than that some of  
76 previous studies (e.g., Eddingsaas et al. (2012a)) (see Fig. S9). SOA yields in this study were also  
77 plotted versus organic aerosol loading to better compare with previous studies (Fig. S8 and S9). 3)  
78 The total particle surface area in this study may also differ from previous studies, which may  
79 influence the apparent SOA yield due to vapor wall loss (the total particle surface area is often not  
80 reported in many previous studies to compare with). 4) RH of this study is different from many  
81 previous studies, which often used very low RH (<10%). It is important to emphasize that reaction  
82 conditions including the  $\text{NO}_x$  as well as  $\text{SO}_2$  concentration range and RH in this study were chosen to  
83 be relevant to the anthropogenic-biogenic interactions in the ambient atmosphere. In addition,  
84 difference in the organic aerosol density used in yield calculation should be taken into account. In this  
85 study, SOA yield was derived using a density of  $1 \text{ g cm}^{-3}$  to better compare with many previous  
86 studies (e.g., (Henry et al., 2012)), while in some other studies SOA yield was derived using different  
87 density (e.g.,  $1.32 \text{ g cm}^{-3}$  in Eddingsaas et al. (2012a)).”

88 *Lines 118: the use of the HR-ToF-AMS to derive elemental ratios uses the older Aiken method.*  
89 *However, as the authors note, the newer 2015 approach corrects some underestimation. Because*  
90 *readers may wish to compare results across studies in the future, it is appropriate and prudent to*  
91 *update the results to the newer calculations.*

92 **Response:**

93 We have calculated the H/C and O/C data using the newer approach by Canagaratna et al. (2015) and  
94 compared them with the data derived from the older method (Aiken et al., 2007) (Fig. S1). The H/C  
95 derived using the newer method strongly correlated with that derived using older method and just  
96 increased by 27%. Similarly, O/C just increased by 11%. In the revised manuscript, we have  
97 discussed this difference.

98 “The H/C and O/C were also derived using the newer approach by Canagaratna et al. (2015) and  
99 compared with the data derived from the Aiken et al. (2007) method. The H/C values derived using  
100 the Canagaratna et al. (2015) method strongly correlated with the values derived using Aiken et al.

101 (2007) method (Fig. S1) and just increased by 27% as suggested by Canagaratna et al. (2015). Similar  
102 results were found for O/C and there was just a difference of 11% in O/C. Since only relative  
103 difference in elemental composition of SOA is studied here, only the data derived using Aiken et al.  
104 (2007) method are shown as the conclusion was not affected by the methods chosen.”

105 *Line 128: the authors note that they account for particle wall loss and dilution loss, but not for vapor*  
106 *wall loss. Recent papers have shown this to be a chemically-dependent and substantial effect on SOA*  
107 *yields, and most rigorous SOA yield work now accounts for these effects. How will ignoring vapor*  
108 *wall loss influence the results – and the interpretation thereof?*

109 **Response:**

110 The wall loss of vapors causes an under-estimate of the SOA yield. In the revised manuscript, we  
111 have estimated the influence of the vapor wall loss on SOA yield using the measured wall loss rate of  
112 vapors. And we have added a section to address the influence of vapor wall loss.

113 **“Wall loss of organic vapors**

114 The loss of organic vapors on chamber walls can influence SOA yield (Kroll et al., 2007;  
115 Zhang et al., 2014; Ehn et al., 2014; Sarrafzadeh et al., 2016; McVay et al., 2016; Nah et al., 2016;  
116 Matsunaga and Ziemann, 2010; Ye et al., 2016; Loza et al., 2010). The wall loss rate of organic  
117 vapors in our chamber was estimated by following the decay of organic vapor concentrations after  
118 photooxidation was stopped in the experiments with low particle surface area ( $\sim 5 \times 10^{-8} \text{ cm}^2 \text{ cm}^{-3}$ ) and  
119 thus low condensational sink on particles. Such method is similar to the method used in previous  
120 studies (Ehn et al., 2014; Sarrafzadeh et al., 2016; Krechmer et al., 2016; Zhang et al., 2015). A high-  
121 resolution time-of-flight chemical ionization mass spectrometer (HR-ToF-CIMS, Aerodyne Research  
122 Inc.) with nitrate ion source ( $^{15}\text{NO}_3^-$ ) was used to measure semi/low-volatile organic vapors. The  
123 details of the instrument were described in our previous studies (Ehn et al., 2014; Sarrafzadeh et al.,  
124 2016). The decay of vapors started from the time when the roof of the chamber was closed. The data  
125 were acquired at a time resolution of 4 s. A typical decay of low-volatile organics is shown in Fig. S3  
126 and the first-order wall loss rate was determined to be around  $6 \times 10^{-4} \text{ s}^{-1}$ .

127 The SOA yield was not directly corrected for the vapor wall loss, but the influence of vapor  
128 wall loss on SOA yield was estimated using the method in the study of Sarrafzadeh et al. (2016) and  
129 the details of the method are described therein. Briefly, particle surface and chamber walls competed  
130 for the vapor loss (condensation) and the condensation on particles led to particle growth. The fraction  
131 of organic vapor loss to particles in the sum of the vapor loss to chamber walls and to particles ( $F_p$ )  
132 was calculated. The vapor loss to chamber walls was derived using the wall loss rate. The vapor loss  
133 to particles was derived using particle surface area concentration, molecular velocity and an  
134 accommodation coefficient  $\alpha_p$  (Sarrafzadeh et al., 2016).  $1/F_p$  ( $f_{\text{corr}}$ ) provides the correction factor to

135 obtain the “real” SOA yield.  $f_{\text{corr}}$  is a function of particle surface area concentration and  
136 accommodation coefficient as shown in Fig. S4. Here a range of 0.1-1 for  $\alpha_p$  was used, which is  
137 generally in line with the ranges of  $\alpha_p$  found by Nah et al. (2016) by fitting a vapor-particle dynamic  
138 model to experimental data. At a given  $\alpha_p$ , the higher particle surface area, the lower  $f_{\text{corr}}$  and the  
139 lower the influence of vapor wall loss are because most vapors condense on particle surface and vice  
140 versa. At a given particle surface area,  $f_{\text{corr}}$  decreases with  $\alpha_p$  because at higher  $\alpha_p$  a larger fraction of  
141 vapors condenses on particles. An average molecular weight of 200 g/mol was used to estimate the  
142 influence of vapor wall loss. For the aerosol surface area range in most of the experiments in this  
143 study, the influence of vapor wall loss on SOA yield was relatively small (<~40% for particle surface  
144 area larger than  $3 \times 10^{-6} \text{ cm}^2 \text{ cm}^{-3}$ , Fig. S4). Yet, for the experiments at high  $\text{NO}_x$  and low  $\text{SO}_2$  for  $\alpha$ -  
145 pinene and limonene, the influence of vapor wall loss on SOA can be high due to the low particle  
146 surface area, especially at lower  $\alpha_p$ .”

147 *In the Introduction, the authors do a good job of summarizing the reasons why such a study would be*  
148 *interesting. Much of the discussion focuses on the role of  $\text{NO}_x$  on SOA yields – this is reasonable as*  
149 *most of the literature has focused on that problem! However, there is some relatively recent literature*  
150 *regarding the role of  $\text{SO}_2$  in affecting SOA chemistry and monoterpene OH oxidation that the authors*  
151 *should consider. In particular:*

152 *Photooxidation of cyclohexene in the presence of  $\text{SO}_2$ : SOA yield and chemical composition.*

153 *Shijie Liu, Long Jia, Yongfu Xu, Narcisse T. Tsona, Shuangshuang Ge, and Lin Du. Atmos. Chem.*  
154 *Phys. Discuss., doi:10.5194/acp-2017-30, 2017*

155 *Synergetic formation of secondary inorganic and organic aerosol: effect of  $\text{SO}_2$  and  $\text{NH}_3$  on particle*  
156 *formation and growth. Biwu Chu, Xiao Zhang, Yongchun Liu, Hong He, Yele Sun, Jingkun Jiang,*  
157 *Junhua Li, and Jiming Hao. Atmos. Chem. Phys., 16, 14219-14230, doi:10.5194/acp-16-14219-2016,*  
158 *2016*

159 *Formation of secondary aerosols from gasoline vehicle exhaust when mixing with  $\text{SO}_2$ . T. Liu, X.*  
160 *Wang, Q. Hu, W. Deng, Y. Zhang, X. Ding, X. Fu, F. Bernard, Z. Zhang, S. Lü, Q. He, X. Bi, J. Chen,*  
161 *Y. Sun, J. Yu, P. Peng, G. Sheng, and J. Fu. Atmos. Chem. Phys., 16, 675-689, doi:10.5194/acp-16-*  
162 *675-2016, 2016*

163 *Anthropogenic Sulfur Perturbations on Biogenic Oxidation:  $\text{SO}_2$  Additions Impact Gas- Phase OH*  
164 *Oxidation Products of  $\alpha$ - and  $\beta$ -Pinene. Beth Friedman, Patrick Brophy, William H. Brune, and*  
165 *Delphine K. Farmer. Environmental Science & Technology 2016 50 (3), 1269-1279. DOI:*  
166 *10.1021/acs.est.5b05010*

167 *Is there any evidence for organic sulfates in the SOA from the AMS data? This has been a subject of*  
168 *some debate in the literature, and an additional datapoint would be useful. This may also clarify the*  
169 *role of acid catalysis, as I believe that has been linked to the formation of organic sulfates.*

170 **Response:**

171 We thank the reviewer for raising these papers. In the revised manuscript, we have enriched the  
172 discussion on the role of SO<sub>2</sub> by including some of the papers.

173 From our AMS data, we did not find evidence of organic sulfate. For SOA formed at high SO<sub>2</sub>, we  
174 found no significant organic fragments containing sulfur. Also the fragment CH<sub>3</sub>SO<sub>2</sub><sup>+</sup> from organic  
175 sulfate suggested by Farmer et al. (2010) was not detectable in our data. We found that the pattern of  
176 sulfate in mass spectra had no significant difference from the pattern of pure ammonium sulfate.  
177 However, we would like to note that AMS has very limited capability to differentiate organic sulfate  
178 and inorganic sulfate (Farmer et al., 2010).

179 Moreover, according to the literature, organic sulfate is mainly formed by aqueous reaction of sulfate  
180 with organics. In the conditions of our study, there was no aqueous phase as we stated based on the  
181 AIM model. Therefore, experimental conditions in our study did not favor the formation organic  
182 sulfate.

183 In the revised manuscript, we have clarified these results.

184 “In addition, from the AMS data of SOA formed at high SO<sub>2</sub> no significant organic fragments  
185 containing sulfur were found. Also the fragment CH<sub>3</sub>SO<sub>2</sub><sup>+</sup> from organic sulfate suggested by Farmer  
186 et al. (2010) was not detected in our data. The absence of organic sulfate tracers is likely due to the  
187 lack of aqueous phase in aerosol particles in this study. Therefore, the influence of SO<sub>2</sub> on gas phase  
188 chemistry of organics and further on SOA yield via affecting gas phase chemistry is not important in  
189 this study.”

190 Minor Comments

191 *Line 136. The authors note an average RH of 28-42% for the experiments. This seems like a relatively*  
192 *large range: will this affect the SOA yields, or interpretation of the data?*

193 **Response:**

194 The average RH was in the range of 28-42% taking into account all experiments. Actually, except one  
195 experiment, the average RH was in the range of 28-34%. For particle phase reactions, the particle  
196 water content absorbed by organic aerosol in the range of 28-42% RH is low and the difference of  
197 water content between 28% and 42 % is very minor (typically <~2% of the particle volume based on  
198 our hygroscopic growth measurement). The RH variations are not expected to significantly change the  
199 particle phase chemistry. Moreover, since water vapor is abundant and in excess in the gas phase, the

200 RH variations are not expected to significant change gas phase chemistry either. Therefore, we do not  
201 expect that would significantly change the SOA yield. In the revised manuscript, we have clarified  
202 this point.

203 “The average RH for the period of monoterpene photooxidation was 28-34% except for one  
204 experiment with average RH of 42% RH.”

205 *Re: Discussion of SO<sub>2</sub> effects. The authors dominantly attribute the enhancement of SOA by SO<sub>2</sub> to*  
206 *increased particle surface area, or perhaps to acid catalysis. These seem like extremely likely reasons;*  
207 *however, there is one study that suggests that SO<sub>2</sub> will influence gas-phase oxidation products*  
208 *(Friedman et al.), which could also be a confounding factor unless all of the SO<sub>2</sub> is in the particle*  
209 *phase before VOC oxidation commences... This would be a useful clarification.*

210 **Response:**

211 The influence of SO<sub>2</sub> on gas phase oxidation is likely to be trivial in this study for two reasons. Firstly,  
212 the reactivity of SO<sub>2</sub> with OH is very low ( $2 \times 10^{-12}$  vs.  $5.3 \times 10^{-11}$  molecules<sup>-1</sup> cm<sup>3</sup> s<sup>-1</sup> for  $\alpha$ -pinene with  
213 OH) and SO<sub>2</sub> only accounts for a very small fraction of the OH loss (typically ~2% in the beginning of  
214 an experiment). Secondly, the OH concentration is 2-3 orders of magnitude lower than those in the  
215 PAM chamber used by Friedman et al. (2016). Therefore, either the change in OH/HO<sub>2</sub> ratio or SO<sub>3</sub>  
216 concentration, which is attributed to the reason of changed oxidation products by Friedman et al.  
217 (2016), is much lower in our experiments. In the revised manuscript, we have added a brief discussion  
218 of the effect of SO<sub>2</sub> on gas phase oxidation of monoterpenes in this study as follows.

219 “SO<sub>2</sub> has been proposed to also affect gas phase chemistry of organics by changing the HO<sub>2</sub>/OH or  
220 forming SO<sub>3</sub> (Friedman et al., 2016). In this study, the effect of SO<sub>2</sub> on gas phase chemistry of  
221 organics was not significant because of the much lower reactivity of SO<sub>2</sub> with OH compared with  $\alpha$ -  
222 pinene and limonene (Atkinson et al., 2004, 2006; Atkinson and Arey, 2003) and the low OH  
223 concentrations (2-3 orders of magnitude lower than those in the study by Friedman et al. (2016)).  
224 Moreover, reactions of RO<sub>2</sub> with SO<sub>2</sub> was also not important because the reaction rate constant is very  
225 low ( $< 10^{-14}$  molecule<sup>-1</sup> cm<sup>3</sup> s<sup>-1</sup>) (Lightfoot et al., 1992; Berndt et al., 2015). In addition, from the AMS  
226 data of SOA formed at high SO<sub>2</sub> no significant organic fragments containing sulfur were found. Also  
227 the fragment CH<sub>3</sub>SO<sub>2</sub><sup>+</sup> from organic sulfate suggested by Farmer et al. (2010) was not detected in our  
228 data. The absence of organic sulfate tracers is likely due to the lack of aqueous phase in aerosol  
229 particles in this study. Therefore, the influence of SO<sub>2</sub> on gas phase chemistry of organics and further  
230 on SOA yield via affecting gas phase chemistry is not important in this study.”

231 *Technical comments.*

232 *Line 26: should read “compared to low NO<sub>x</sub>”*

233 **Response:** Corrected.

234 *Line 29: should read “SO<sub>2</sub> can compensate for such effects”*

235 **Response:** Corrected.

236 *Introduction: line 34: sentence has repetitive ‘important’: consider removing at least one (e.g. “SOA*  
237 *is an important class of atmospheric aerosol” seems like an unnecessary statement for the journal’s*  
238 *audience). This adjective is used heavily throughout the introduction (lines 45, 49), and I recommend*  
239 *removing or replacing the adjective to improve readability.*

240 **Response:** We have accepted the reviewer’s suggestion. In the revised manuscript, we have removed  
241 the “as an important class of atmospheric aerosol”, and removed or replaced “important” where it is  
242 necessary.

243 *Line 56: hydroperoxides should be plural*

244 **Response:** Corrected.

245 *Line 57: need comma between ‘NO’ and ‘forming’*

246 **Response:** Corrected.

247 *Line 87: should read “might have either counteracting or synergistic effects on SOA: : :”*

248 **Response:** Corrected.

249 *Line 126: remove the with following ‘multiplied by’*

250 **Response:** Done.

251 *Line 135: should read ‘there was no aqueous..’*

252 **Response:** Corrected.

253 *Line 221, remove comma between ‘that’ and ‘high’*

254 **Response:** Done.

255 *Line 360: should read ‘in the ambient atmosphere’*

256 **Response:** Corrected.



257 **References**

- 258 Aiken, A. C., DeCarlo, P. F., and Jimenez, J. L.: Elemental analysis of organic species with electron  
259 ionization high-resolution mass spectrometry, *Anal. Chem.*, 79, 8350-8358, 10.1021/ac071150w,  
260 2007.
- 261 Berndt, T., Richters, S., Kaethner, R., Voigtlander, J., Stratmann, F., Sipila, M., Kulmala, M., and  
262 Herrmann, H.: Gas-Phase Ozonolysis of Cycloalkenes: Formation of Highly Oxidized RO<sub>2</sub> Radicals  
263 and Their Reactions with NO, NO<sub>2</sub>, SO<sub>2</sub>, and Other RO<sub>2</sub> Radicals, *J. Phys. Chem. A* 119, 10336-  
264 10348, 10.1021/acs.jpca.5b07295, 2015.
- 265 Canagaratna, M. R., Jimenez, J. L., Kroll, J. H., Chen, Q., Kessler, S. H., Massoli, P., Hildebrandt  
266 Ruiz, L., Fortner, E., Williams, L. R., Wilson, K. R., Surratt, J. D., Donahue, N. M., Jayne, J. T., and  
267 Worsnop, D. R.: Elemental ratio measurements of organic compounds using aerosol mass  
268 spectrometry: characterization, improved calibration, and implications, *Atmos. Chem. Phys.*, 15, 253-  
269 272, 10.5194/acp-15-253-2015, 2015.
- 270 Eddingsaas, N. C., Loza, C. L., Yee, L. D., Chan, M., Schilling, K. A., Chhabra, P. S., Seinfeld, J. H.,  
271 and Wennberg, P. O.: alpha-pinene photooxidation under controlled chemical conditions - Part 2:  
272 SOA yield and composition in low- and high-NO<sub>x</sub> environments, *Atmos. Chem. Phys.*, 12, 7413-  
273 7427, 10.5194/acp-12-7413-2012, 2012.
- 274 Ehn, M., Thornton, J. A., Kleist, E., Sipila, M., Junninen, H., Pullinen, I., Springer, M., Rubach, F.,  
275 Tillmann, R., Lee, B., Lopez-Hilfiker, F., Andres, S., Acir, I. H., Rissanen, M., Jokinen, T.,  
276 Schobesberger, S., Kangasluoma, J., Kontkanen, J., Nieminen, T., Kurten, T., Nielsen, L. B.,  
277 Jorgensen, S., Kjaergaard, H. G., Canagaratna, M., Dal Maso, M., Berndt, T., Petaja, T., Wahner, A.,  
278 Kerminen, V. M., Kulmala, M., Worsnop, D. R., Wildt, J., and Mentel, T. F.: A large source of low-  
279 volatility secondary organic aerosol, *Nature*, 506, 476-479, 10.1038/nature13032, 2014.
- 280 Farmer, D. K., Matsunaga, A., Docherty, K. S., Surratt, J. D., Seinfeld, J. H., Ziemann, P. J., and  
281 Jimenez, J. L.: Response of an aerosol mass spectrometer to organonitrates and organosulfates and  
282 implications for atmospheric chemistry, *Proc. Nat. Acad. Sci. U.S.A.*, 107, 6670-6675,  
283 10.1073/pnas.0912340107, 2010.
- 284 Friedman, B., Brophy, P., Brune, W. H., and Farmer, D. K.: Anthropogenic Sulfur Perturbations on  
285 Biogenic Oxidation: SO<sub>2</sub> Additions Impact Gas-Phase OH Oxidation Products of alpha- and beta-  
286 Pinene, *Environ. Sci. Technol.*, 50, 1269-1279, 10.1021/acs.est.5b05010, 2016.
- 287 Krechmer, J. E., Pagonis, D., Ziemann, P. J., and Jimenez, J. L.: Quantification of Gas-Wall  
288 Partitioning in Teflon Environmental Chambers Using Rapid Bursts of Low-Volatility Oxidized  
289 Species Generated in Situ, *Environ. Sci. Technol.*, 50, 5757-5765, 10.1021/acs.est.6b00606, 2016.
- 290 Kroll, J. H., Chan, A. W. H., Ng, N. L., Flagan, R. C., and Seinfeld, J. H.: Reactions of semivolatile  
291 organics and their effects on secondary organic aerosol formation, *Environ. Sci. Technol.*, 41, 3545-  
292 3550, 10.1021/es062059x, 2007.
- 293 Lightfoot, P. D., Cox, R. A., Crowley, J. N., Destriau, M., Hayman, G. D., Jenkin, M. E., Moortgat,  
294 G. K., and Zabel, F.: Organic peroxy-radicals - kinetics, spectroscopy and tropospheric chemistry,  
295 *Atmospheric Environment Part a-General Topics*, 26, 1805-1961, 10.1016/0960-1686(92)90423-i,  
296 1992.
- 297 Loza, C. L., Chan, A. W. H., Galloway, M. M., Keutsch, F. N., Flagan, R. C., and Seinfeld, J. H.:  
298 Characterization of Vapor Wall Loss in Laboratory Chambers, *Environ. Sci. Technol.*, 44, 5074-5078,  
299 10.1021/es100727v, 2010.
- 300 Matsunaga, A., and Ziemann, P. J.: Gas-Wall Partitioning of Organic Compounds in a Teflon Film  
301 Chamber and Potential Effects on Reaction Product and Aerosol Yield Measurements, *Aerosol Sci.*  
302 *Technol.*, 44, 881-892, 10.1080/02786826.2010.501044, 2010.

303 McVay, R. C., Zhang, X., Aumont, B., Valorso, R., Camredon, M., La, Y. S., Wennberg, P. O., and  
304 Seinfeld, J. H.: SOA formation from the photooxidation of alpha-pinene: systematic exploration of the  
305 simulation of chamber data, *Atmos. Chem. Phys.*, 16, 2785-2802, 10.5194/acp-16-2785-2016, 2016.

306 Nah, T., McVay, R. C., Zhang, X., Boyd, C. M., Seinfeld, J. H., and Ng, N. L.: Influence of seed  
307 aerosol surface area and oxidation rate on vapor wall deposition and SOA mass yields: a case study  
308 with alpha-pinene ozonolysis, *Atmos. Chem. Phys.*, 16, 9361-9379, 10.5194/acp-16-9361-2016, 2016.

309 Sarrafzadeh, M., Wildt, J., Pullinen, I., Springer, M., Kleist, E., Tillmann, R., Schmitt, S. H., Wu, C.,  
310 Mentel, T. F., Zhao, D. F., Hastie, D. R., and Kiendler-Scharr, A.: Impact of NO<sub>x</sub> and OH on  
311 secondary organic aerosol formation from beta-pinene photooxidation, *Atmos. Chem. Phys.*, 16,  
312 11237-11248, 10.5194/acp-16-11237-2016, 2016.

313 Ye, P. L., Ding, X., Hakala, J., Hofbauer, V., Robinson, E. S., and Donahue, N. M.: Vapor wall loss  
314 of semi-volatile organic compounds in a Teflon chamber, *Aerosol Sci. Technol.*, 50, 822-834,  
315 10.1080/02786826.2016.1195905, 2016.

316 Zhang, X., Cappa, C. D., Jathar, S. H., McVay, R. C., Ensberg, J. J., Kleeman, M. J., and Seinfeld, J.  
317 H.: Influence of vapor wall loss in laboratory chambers on yields of secondary organic aerosol, *Proc.*  
318 *Nat. Acad. Sci. U.S.A.*, 111, 5802-5807, 10.1073/pnas.1404727111, 2014.

319 Zhang, X., Schwantes, R. H., McVay, R. C., Lignell, H., Coggon, M. M., Flagan, R. C., and Seinfeld,  
320 J. H.: Vapor wall deposition in Teflon chambers, *Atmos. Chem. Phys.*, 15, 4197-4214, 10.5194/acp-  
321 15-4197-2015, 2015.

322

323
