# Supplementary material for: Effects of NO x and SO 2 on the Secondary Organic Aerosol Formation from Photooxidation of α-pinene and Limonene
Source: Copernicus journal article supplement (doi:10.5194/acp-2017-294), 2017-04-04
Supplement: Supplementary file [file acp-2017-294-AC2-supplement.pdf]

1 **Responses to Referee # 2**

2 We thank the reviewer for carefully reviewing our manuscript; the comments and suggestions are  
3 very helpful and greatly appreciated. All the comments have been addressed. We believe that  
4 revisions based on these comment have substantially improved our manuscript. In the following  
5 please find our responses to the comments one by one and the corresponding changes made to the  
6 manuscript. The original comments are shown in italics. The revised parts of the manuscript are  
7 highlighted.

8 Before we start our responses to the reviewer, we would like to briefly clarify the motivation of this  
9 manuscript. Our primary goal of this study is to investigate how and to what extent small ambient  
10 inorganic trace gases, here  $\text{NO}_x$  and  $\text{SO}_2$ , affect the SOA formation in the ambient  
11 anthropogenic-biogenic interactions. We aimed to study the more complex situation found in the  
12 ambient atmosphere instead of pure VOC reaction systems. Our main goal is not so much to provide a  
13 single absolute value of SOA yield to modelers nor to simply “improve” values of the SOA yields  
14 from previous studies because all chamber studies have operational limitations compared to the  
15 atmosphere (e.g. wall effects). Often different studies have distinct physical and chemical regimes due  
16 to the different operational limitations and diverse experimental conditions e.g. chamber size, radical  
17 generation, and photolysis rates. We as well as the community are in the course of addressing the  
18 influence of wall loss of vapors. We believe that, rather denying the findings from previous studies,  
19 our study provided additional knowledge and insights to existing understanding of SOA formation in  
20 certain conditions of the real atmosphere. This is based on the fact that our experiments were  
21 conducted under conditions relatively close to the ambient anthropogenic-biogenic interactions,  
22 including ambient RH, concentrations of  $\text{SO}_2$ ,  $\text{NO}_x$ , and VOC close to ambient levels, natural  
23 sunlight, and low surface-to-volume ratio of our large chamber.

24 ***Anonymous Referee #2***

25 *This chamber study investigated the effects of  $\text{SO}_2$  and  $\text{NO}_x$  ( $\text{NO}$ ) on SOA formation from*  
26 *photooxidation of  $\alpha$ -pinene and limonene. It was found that  $\text{SO}_2$  enhanced SOA yield while  $\text{NO}_x$*   
27 *suppressed SOA yield. The suppression effect of  $\text{NO}_x$  was attributed to the suppressed new particle*  
28 *formation and thus a lack of particle surface area for organics to condense on. The authors concluded*  
29 *that  $\text{SO}_2$  oxidation produced high number of particles and compensated for the suppression of SOA*  
30 *yield by  $\text{NO}_x$ . SOA composition measured by AMS was also presented and discussed.*

31 *This is an interesting study. The gas- and particle-phase measurements are comprehensive and*  
32 *include several important species that have not been typically characterized in previous studies (e.g.,*  
33  *$\text{OH}$ ,  $\text{HO}_2$  and  $\text{RO}_2$ ). The experiments appeared to be carefully conducted. However, I have major*  
34 *concerns regarding data interpretation and some conclusions in the manuscript.*

35 *One of the central themes of the manuscript is that the suppression effect of  $\text{NO}_x$  on SOA formation*

36 can be compensated by the presence of SO<sub>2</sub>. This conclusion is not accurate based on all the data  
37 presented in this manuscript. For  $\alpha$ -pinene, it appears that under high SO<sub>2</sub> conditions, the SOA yields  
38 under low vs. high NO<sub>x</sub> conditions are comparable. However, this is not the case for limonene, where  
39 there is still a large difference in SOA yields between low vs. high NO<sub>x</sub> conditions in the presence of  
40 high SO<sub>2</sub>. The manuscript needs to be thoroughly revised to accurately reflect what the data are  
41 showing. If one set of data is showing one thing and another set of data is showing the opposite, the  
42 authors need to discuss both datasets equally and cannot conclude that SO<sub>2</sub> effect can compensate  
43 NO<sub>x</sub> effect.

44 **Response:**

45 A key result in our study is that for both  $\alpha$ -pinene and limonene, the difference in SOA yield between  
46 high NO<sub>x</sub> and low NO<sub>x</sub> was much reduced in the presence of SO<sub>2</sub>, although for limonene the SOA  
47 yield at high NO<sub>x</sub> and high SO<sub>2</sub> was still lower than the yield at low NO<sub>x</sub>. This result indicates that the  
48 suppression of SOA yield by NO<sub>x</sub> was compensated to a large extent by SO<sub>2</sub>. This conclusion holds  
49 regardless the difference in the detailed results between  $\alpha$ -pinene and limonene system.

50 In the revised manuscript, we have revised the conclusion to better represent the results from both  
51  $\alpha$ -pinene and limonene cases. The following sentence has been revised in the conclusion part:

52 “SO<sub>2</sub> oxidation produced high number concentration of particles and compensated for the suppression  
53 of SOA yield by NO<sub>x</sub> to a large extent.”

54 The abstract has been revised accordingly as follows.

55 “However, in the presence of SO<sub>2</sub> which induced high number concentration of particles after  
56 oxidation to H<sub>2</sub>SO<sub>4</sub>, the suppression of the mass yield of SOA by NO<sub>x</sub> was completely or partly  
57 compensated.”

58 *The authors concluded that the suppression effect of NO<sub>x</sub> on SOA yields is mainly due to suppression  
59 of nucleation (absence of particle surface area as condensation sink) rather than decrease of  
60 condensable materials. If particle surface area plays a role, this will point to the importance of loss  
61 process of oxidation products via chemical reactions and/or chamber wall loss. However, the effect of  
62 loss of organic vapors on chamber walls is not considered in this study. Nevertheless, previous studies  
63 on  $\alpha$ -pinene oxidation suggested that SOA yield is independent of particle surface area. In this regard,  
64 the interpretation that the suppression effect of NO<sub>x</sub> arises from a lack of particle surface area  
65 appears to be at odds with previous studies. All in all, it is not clear how the absence of particle  
66 surface area can explain the suppressed SOA yields under high NO<sub>x</sub> condition in this study.*

67 **Response:**

68 In general, condensable SOA materials are chemically produced in the gas-phase and nucleation and  
69 condensation on particle surface constitute sinks for the SOA materials besides other sinks e.g. wall  
70 loss and flush out. In the case of sufficient nucleation or seeded experiments, condensation on  
71 particles is the dominant sink. In absence of nucleation and surface, the other sinks such as wall loss

72 dominate the losses of SOA materials. Therefore, no SOA would be formed without nucleation. This  
73 *a priori* tells nothing about the importance of wall losses when SOA is formed.

74 The loss of organic vapors to chamber walls can be important for SOA yield, although in our  
75 manuscript we had not corrected for it because it is a challenge to quantify it. In the revised  
76 manuscript, we have added a section to estimate the influence of vapor wall loss on SOA yield (Sect.  
77 “2.3 Wall loss of organic vapors”) and provided more discussion on vapor wall loss. We found that  
78 the influence of vapor wall loss on SOA yield is likely to be significant when surface area  
79 concentrations of SOA formed were low in the high NO<sub>x</sub> and low SO<sub>2</sub> conditions. Yet, the influence  
80 of vapor wall loss is likely to be not significant at the higher surface area concentrations of SOA  
81 formed in the low NO<sub>x</sub> conditions or high NO<sub>x</sub> and high SO<sub>2</sub> conditions.

82 We respectfully disagree with the reviewer’s statement that “previous studies on  $\alpha$ -pinene oxidation  
83 suggested that SOA yield is independent of particle surface area” without considering each specific  
84 study. Although some studies showed that SOA yield from  $\alpha$ -pinene oxidation is independent of seed  
85 particle surface area (McVay et al., 2016; Nah et al., 2016), a number of studies showed that SOA  
86 yield from  $\alpha$ -pinene ozonolysis or photooxidation depends on particle surface area. For example, our  
87 previous studies clearly showed that SOA yields from  $\alpha$ -pinene photooxidation depend on surface  
88 area (Sarrafzadeh et al., 2016; Ehn et al., 2014), and Eddingsaas et al. (2012) also showed that in  
89 “high NO” conditions, SOA yield from  $\alpha$ -pinene photooxidation is much higher with neutral seed  
90 than that without seed. The discrepancy in the dependence of SOA yield on particle surface areas in  
91 the literature can be attributed to reaction conditions, surface area range and chamber setup. For  
92 example, if the reaction produces enough new particles by itself and results in fast particle growth and  
93 larger aerosol surface area as the dominant condensational sink for vapors compared to the loss on  
94 chamber walls, SOA yield would be less affected by the seed surface area. On the contrary, if VOC  
95 oxidation does not induce nucleation by itself, all vapors would be lost onto the chamber walls and  
96 SOA yield would be essentially zero.

97 In this study, at high NO<sub>x</sub> and low SO<sub>2</sub>, the particle number and surface area concentrations were low  
98 (peak surface area concentration of  $6.8 \times 10^{-7} \text{ cm}^2 \text{ cm}^{-3}$  and particle-to-chamber surface ratio of  
99  $7.7 \times 10^{-5}$  for  $\alpha$ -pinene), much lower than the aerosol surface area range in the studies by Nah et al.  
100 (2016) and McVay et al. (2016) ( $\sim 10^{-5} \text{ cm}^2 \text{ cm}^{-3}$  and particle-to-chamber surface ratio of  $>4 \times 10^{-5}$ ). In  
101 addition, not only seed particle surface area but also total particle surface area formed during reaction  
102 provide condensational sinks to compete with vapor wall loss. At such low particle surface area  
103 concentrations, the condensation of vapors on particles had a much longer time scale than that of the  
104 wall loss and a large fraction of vapors condensed on chamber walls. Therefore, SOA yield was  
105 significantly suppressed due to lack of particle surface area.

106 In the revised manuscript, we have discussed the findings in the literature.

107 “Artificially added seed aerosol has been shown to enhance SOA formation from  $\alpha$ -pinene and

108  $\beta$ -pinene oxidation (Ehn et al., 2014; Sarrafzadeh et al., 2016; Eddingsaas et al., 2012a). In some other  
109 studies, it was found that the SOA yield from  $\alpha$ -pinene oxidation is independent of initial seed surface  
110 area (McVay et al., 2016; Nah et al., 2016). The difference in the literature may be due to the range of  
111 total surface area of particles, reaction conditions and chamber setup. For example, the peak  
112 particle-to-chamber surface ratio for  $\alpha$ -pinene photooxidation in this study was  $7.7 \times 10^{-5}$  at high  $\text{NO}_x$   
113 and low  $\text{SO}_2$ , much lower than the aerosol surface area range in the studies by Nah et al. (2016) and  
114 McVay et al. (2016). A lower particle-to-chamber surface ratio can lead to a larger fraction of  
115 organics lost on chamber walls. Hence, providing additional particle surface by adding seed particles  
116 can increase the condensation of organics on particles and thus increase SOA yield. However, once  
117 the surface area is high enough to inhibit condensation of vapors on chamber walls, further  
118 enhancement of particle surface will not significantly enhance the yield (Sarrafzadeh et al., 2016).”

119 *The authors explained the effect of  $\text{SO}_2$  as 1) inducing new particle formation and providing surface*  
120 *area for vapor condensation, 2) acid-catalyzed particle-phase reactions. I have the same question*  
121 *regarding the first explanation, i.e., what is the role of vapor wall loss (if any), and how does one*  
122 *reconcile this explanation with findings from previous studies? Also, what is the effect of  $\text{SO}_2$  on*  
123 *gas-phase chemistry and SOA yield? This is not considered.*

124 **Response:**

125 The role of vapor wall loss can be referred to our response to the comment above. Wall loss of vapors  
126 leads to an underestimate of SOA yield. Condensation of vapors onto aerosol particle surface  
127 competes with the loss of vapors on chamber walls. Therefore the surface area provided by nucleation  
128 and growth of particles in the presence of  $\text{SO}_2$  enhanced the SOA yield in this study.

129 Only few studies have investigated the effect of  $\text{SO}_2$  on the SOA yield from  $\alpha$ -pinene oxidation. More  
130 studies investigated the effect of seed aerosol and particle acidity. Kleindienst et al. (2006) attributed  
131 the increase of SOA yield in the presence of  $\text{SO}_2$  to the formation of  $\text{H}_2\text{SO}_4$  acidic aerosol. While  
132 particle acidity may contribute to the increased SOA yield, especially at high  $\text{NO}_x$ , the effect of  
133 facilitating nucleation and further providing surface area seems to be more important in our study.  
134 The importance of the  $\text{SO}_2$  via nucleating and providing particle surface depends on the particle  
135 surface area in the absence of  $\text{SO}_2$  because the competition for the condensation of vapors between  
136 particles and wall depends on particle surface area. When VOC oxidation does not form enough new  
137 particles and particle surface by itself, the role of  $\text{SO}_2$  via nucleating and providing particle surface in  
138 enhancing SOA yield is more important. In the revised manuscript, we have added more discussion on  
139 this aspect.

140 “Particle acidity may also play a role in affecting the SOA yield in the experiments with high  $\text{SO}_2$ .  
141 Particle acidity was found to enhance the SOA yield from  $\alpha$ -pinene photooxidation at high  $\text{NO}_x$   
142 (Offenberg et al., 2009) and “high  $\text{NO}$ ” conditions (Eddingsaas et al., 2012a). Yet, in low  $\text{NO}_x$   
143 condition, particle acidity was reported to have no significant effect on the SOA yield from  $\alpha$ -pinene

144 photooxidation (Eddingsaas et al., 2012a; Han et al., 2016). According to these findings, at low NO<sub>x</sub>  
145 the enhancement of SOA yield in this study is attributed to the effect of facilitating nucleation and  
146 providing more particle surface by SO<sub>2</sub> photooxidation. At high NO<sub>x</sub>, the effect in enhancing new  
147 particle formation by SO<sub>2</sub> photooxidation seems to be more important, although the effect of particle  
148 acidity resulted from SO<sub>2</sub> photooxidation may also play a role.”

149 The effect of SO<sub>2</sub> on gas phase chemistry is not significant in this study because the reaction rate of  
150 SO<sub>2</sub> with OH ( $\sim 2 \times 10^{-12}$  molecules<sup>-1</sup> cm<sup>3</sup> s<sup>-1</sup>) and with RO<sub>2</sub> ( $< 10^{-14}$  molecule<sup>-1</sup> cm<sup>3</sup> s<sup>-1</sup>) are very low  
151 (Lightfoot et al., 1992; Berndt et al., 2015). From the AMS data of SOA formed at high SO<sub>2</sub>, we  
152 found no significant organic fragments containing sulfur. Also the fragment CH<sub>3</sub>SO<sub>2</sub><sup>+</sup> suggested by  
153 Farmer et al. (2010) was not detected in our data. Therefore, we conclude that in our study, the effect  
154 of SO<sub>2</sub> on gas phase chemistry of organics and thus further on SOA yield via affecting gas phase  
155 chemistry is not important.

156 In the revised manuscript, we have added the following discussion about this point.

157 “SO<sub>2</sub> has been proposed to also affect gas phase chemistry of organics by changing the HO<sub>2</sub>/OH or  
158 forming SO<sub>3</sub> (Friedman et al., 2016). In this study, the effect of SO<sub>2</sub> on gas phase chemistry of  
159 organics was not significant because of the much lower reactivity of SO<sub>2</sub> with OH compared with  
160 α-pinene and limonene (Atkinson et al., 2004, 2006; Atkinson and Arey, 2003) and the low OH  
161 concentrations (2-3 orders of magnitude lower than those in the study by Friedman et al. (2016)).  
162 Moreover, reactions of RO<sub>2</sub> with SO<sub>2</sub> was also not important because the reaction rate constant is very  
163 low ( $< 10^{-14}$  molecule<sup>-1</sup> cm<sup>3</sup> s<sup>-1</sup>) (Lightfoot et al., 1992; Berndt et al., 2015). In addition, from the AMS  
164 data of SOA formed at high SO<sub>2</sub> no significant organic fragments containing sulfur were found. Also  
165 the fragment CH<sub>3</sub>SO<sub>2</sub><sup>+</sup> from organic sulfate suggested by Farmer et al. (2010) was not detected in our  
166 data. The absence of organic sulfate tracers is likely due to the lack of aqueous phase in aerosol  
167 particles in this study. Therefore, the influence of SO<sub>2</sub> on gas phase chemistry of organics and further  
168 on SOA yield via affecting gas phase chemistry is not important in this study.”

169 *It appears that the SOA yields in high SO<sub>2</sub> experiments might be overestimated by double counting*  
170 *the density of ammonium sulfate/ammonium bisulfate in the SOA mass calculation. This is not entirely*  
171 *clear.*

172 **Response:**

173 The density of SOA in high SO<sub>2</sub> experiments was not double counted. In the revised manuscript, we  
174 have clarified this point. Please also refer to our response to the similar comment below (“detailed  
175 comment” 3).

176 “...and their respective density (1.32 g cm<sup>-3</sup> for organic aerosol from one of our previous studies  
177 (Flores et al., 2014) and the literature (Ng et al., 2007) and ~1.77 g cm<sup>-3</sup> for ammonium  
178 sulfate/ammonium bisulfate)...”

179 We would like to note that the SOA yield in this study was derived by adjusting the density of SOA to

180 1 g cm<sup>-3</sup>.

181 *Finally, the authors need to conduct a more careful and accurate comparison with previous studies. It*  
182 *was noted that in high SO<sub>2</sub> conditions, their findings that SOA yields are comparable under high NO<sub>x</sub>*  
183 *and low NO<sub>x</sub> conditions are in line with Sarrafzadeh et al. and Eddingsaas et al. I do not think that*  
184 *the data in Eddingsaas et al. showed this. SOA yields are also a function of deltaMo (as well as*  
185 *various experimental conditions and parameters) and this could play a role, see detailed comment*  
186 *below. Also, the  $\alpha$ -pinene yields in this study under comparable NO<sub>x</sub>/SO<sub>2</sub>/OH exposure are much*  
187 *lower than Eddingsaas et al.. This is not mentioned and discussed in the manuscript.*

188 **Response:**

189 In the revised manuscript, we have added more discussion to compare this study with previous studies  
190 and added a table summarizing previous studies.

191 Please refer to our detailed responses to the specific comments below (“detailed comments” 11d, e).

192 *Major revisions are needed before the manuscript can be published. Specific comments are listed*  
193 *below.*

194 *Detailed comments*

195 *1. Line 18-20. This statement is not true for limonene data presented in this study.*

196 **Response:**

197 In the revised manuscript, we have modified this statement. Please refer to our response to a similar  
198 comment above (Pg. 1, lines 35-43).

199 *2. Line 79 -81. This sentence seems to imply that previous studies that used higher NO<sub>x</sub> and SO<sub>2</sub>*  
200 *concentrations are not atmospherically relevant. I think these sentences should be revised and*  
201 *clarified to more accurately reflect the experimental design and results from previous studies. For*  
202 *instance, the use of high levels of NO<sub>x</sub> (e.g., from HONO or CH<sub>3</sub>ONO) in some studies is to push the*  
203 *RO<sub>2</sub> radical fate to the extreme (i.e., RO<sub>2</sub>+NO or RO<sub>2</sub>+NO<sub>2</sub>) to investigate SOA yields and*  
204 *composition under such conditions. Thus, the use of high levels of NO<sub>x</sub> do not necessarily mean that*  
205 *the results are not applicable to ambient conditions.*

206 **Response:**

207 We understand that in some studies high concentration of NO<sub>x</sub> is intentionally used to push the RO<sub>2</sub>  
208 radical fate to an extreme in order to study the SOA yields and composition. Nevertheless,  
209 experiments under ambient levels of high NO<sub>x</sub> concentrations are more transferable to the ambient  
210 anthropogenic-biogenic interaction than the experiments conducted at extremely high NO<sub>x</sub>  
211 concentrations considering the shortened lifetime of RO<sub>2</sub> and the potential secondary processes as  
212 well as the effect of NO<sub>x</sub> on OH concentration at extremely high NO<sub>x</sub>. In the revised manuscript, we  
213 have modified this sentence.

214 “For example, many studies used very high NO<sub>x</sub> and SO<sub>2</sub> concentrations (up to several hundreds of  
215 ppb). High NO<sub>x</sub> can make the RO<sub>2</sub> radical fate dominated by one single pathway (i.e., RO<sub>2</sub>+NO or

216 RO<sub>2</sub>+NO<sub>2</sub>) to investigate SOA yields and composition under such conditions. Yet, the effects of NO<sub>x</sub>  
217 and SO<sub>2</sub> at concentration ranges for ambient anthropogenic-biogenic interactions (sub ppb to several  
218 tens of ppb for NO<sub>2</sub> and SO<sub>2</sub>) have seldom been directly addressed.”

219 3. Line 132. Is the organic aerosol density 1.32 g/cm<sup>3</sup> from Eddingsaas et al. (2012a)? If this is the  
220 case, note that this density used in Eddingsaas et al. is directly taken from the results in Ng et al.  
221 (2007), and that this density was obtained in the presence of seeds already. Therefore, it appears that  
222 there might be a double counting of the density of ammonium sulfate/ammonium bisulfate in the data  
223 presented here?

224 **Response:**

225 Organic aerosol density was based on our previous study (Flores et al., 2014) as well as the study of  
226 Eddingsaas et al. (2012) and thus Ng et al. (2007).

227 Although the density of organic aerosol in the study of Ng et al. (2007) was obtained in presence of  
228 seed, the contribution of seed aerosol (ammonium sulfate) to particle volume and thus density has  
229 been taken into account (Bahreini et al., 2005) . The value reported by Ng et al. (2007) is the density  
230 of organic aerosol instead of the density of mixed aerosol. There is no double counting of the density  
231 of ammonium sulfate/ammonium bisulfate in our study.

232 4. Line 162. How were OH and O<sub>3</sub> formed in the experiments (under each combination of NO<sub>x</sub>/SO<sub>2</sub>  
233 condition). Please provide more info. Also, please provide typical time profiles of VOC (either  
234 *α*-pinene or limonene), O<sub>3</sub>, OH, NO, NO<sub>2</sub>, SO<sub>2</sub> for each combination of NO<sub>x</sub>/SO<sub>2</sub> condition. These  
235 are important to help the readers obtain a better idea of the reaction pathways/regimes under each  
236 condition.

237 **Response:**

238 OH was formed via HONO photolysis, which was produced from a photolytic process on the Teflon  
239 chamber wall as we described in the manuscript. The details can be found in a previous study on our  
240 chamber (Rohrer et al., 2005). In the revised manuscript, we have added one more sentence to better  
241 clarify this point.

242 “OH was formed via HONO photolysis, which was produced from a photolytic process on the Teflon  
243 chamber wall (Rohrer et al., 2005).”

244 In addition, in all VOC photooxidation of our study, OH was partly contributed by the recycling  
245 reaction of HO<sub>2</sub> with NO. The reaction of HO<sub>2</sub> and RO<sub>2</sub> with NO also produces NO<sub>2</sub>, whose  
246 photolysis further forms O<sub>3</sub>. While the detailed mechanism of O<sub>3</sub> formation is beyond the scope of  
247 this study, we have provided a brief description in the revised manuscript.

248 “O<sub>3</sub> was formed in photochemical reactions since NO<sub>x</sub>, even in trace amount (<~1 ppbV), was present  
249 in this study.”

250 “In the photooxidation of VOC, OH and O<sub>3</sub> often co-exist and both contribute to VOC oxidation  
251 because O<sub>3</sub> formation in chamber studies is often unavoidable during photochemical reactions of

252 VOC even in the presence of trace amount of NO<sub>x</sub>.”

253 In the revised manuscript, we have provided time profiles of VOC, O<sub>3</sub>, OH, NO, and NO<sub>2</sub> in low NO<sub>x</sub>  
254 and high NO<sub>x</sub> conditions for α-pinene and limonene (Fig. S5). Time profiles of these species at high  
255 SO<sub>2</sub> were similar to those at low SO<sub>2</sub> because SO<sub>2</sub> had little effect on gas phase chemistry due to its  
256 low reactivity of SO<sub>2</sub> with OH and RO<sub>2</sub>, and thus are not further shown. SO<sub>2</sub> time series are shown  
257 separately (Fig. S2).

258 5. Line 163. Was all the VOC reacted in each experiment?

259 **Response:**

260 All the VOC precursor was consumed in the experiments of this study except for one experiment  
261 where small amount of VOC (~10%) was still left at the end of the reaction due to the cloudy  
262 condition and thus lower photolysis rates.

263 6. Lin 163. There is no “typical” experiment in this study, as each experiment was conducted under a  
264 different NO<sub>x</sub>/SO<sub>2</sub> condition. Please clearly state that this is only for low NO<sub>x</sub> condition. Also, what  
265 about high NO<sub>x</sub> condition? Was it exclusively OH reaction? Please also specify clearly.

266 **Response:**

267 The relative dominance of OH oxidation over ozonolysis (as shown in Fig. 6) is similar in both the  
268 low NO<sub>x</sub> and high NO<sub>x</sub> conditions. At high NO<sub>x</sub>, OH was often higher and meanwhile more O<sub>3</sub> was  
269 also produced.

270 In the revised manuscript, we have modified this sentence as follows.

271 “For all the experiment in this study, the VOC loss was dominated by OH oxidation over ozonolysis  
272 (see Fig. S6 as an example). The relative importance of the reaction of OH and O<sub>3</sub> with monoterpenes  
273 was similar in the low NO<sub>x</sub> and high NO<sub>x</sub> experiments. At high NO<sub>x</sub>, OH was often higher while more  
274 O<sub>3</sub> was also produced.”

275 7. Line 173 – 177. Here, under low NO<sub>x</sub> condition, RO<sub>2</sub>+NO dominates throughout the entire  
276 experiment (RO<sub>2</sub>+HO<sub>2</sub> only contributes to 40% at most).

277 a. These sentences clearly demonstrate the shortcomings of classifying the experiments as low NO<sub>x</sub> vs.  
278 high NO<sub>x</sub> as discussed in Wennberg et al. (IGAC news, 2103). I suggest the authors to characterize  
279 reactions conditions by explicitly stating the RO<sub>2</sub> fates, rather than as low vs. high NO<sub>x</sub>.

280 **Response:**

281 We had clearly defined our low NO<sub>x</sub> and high NO<sub>x</sub> conditions using the RO<sub>2</sub> fate in our study.  
282 Therefore, we respectfully do not think that using the terms “low NO<sub>x</sub>” and “high NO<sub>x</sub>” caused  
283 ambiguity as long as we define them clearly.

284 In the revised manuscript, we have added the following sentence to emphasize the RO<sub>2</sub> fates under  
285 different NO<sub>x</sub> conditions.

286 “Note that the RO<sub>2</sub> fate in the low and high NO<sub>x</sub> conditions quantified here are further used in the  
287 discussion below since the information of RO<sub>2</sub> fate is important for data interpretation of experiments

288 conducted at different NO<sub>x</sub> levels (Wennberg, 2013).”

289 *b. It is stated that under low NO<sub>x</sub> conditions, in the beginning of the experiment, a trace amount of*  
290 *NO is formed from photolysis of HONO from the chamber wall. Is this just in the beginning of the*  
291 *experiment, or there is a continuous NO source from HONO photolysis throughout the entire*  
292 *experiment? Please specify.*

293 **Response:**

294 There is a continuous NO source from HONO photolysis. In the revised manuscript, we have clarified  
295 this as follows.

296 “The trace amount of NO (up to ~0.2 ppbV) was from the photolysis of HONO, which was  
297 continuously produced from a photolytic process on chamber walls throughout an experiment (Rohrer  
298 et al., 2005).”

299 *8. Line 189. The authors attributed the lower particle number concentration and nucleation rate at*  
300 *high NO<sub>x</sub> to the decreasing RO<sub>2</sub>+RO<sub>2</sub> reaction in the presence of NO<sub>x</sub>. However, in line 182, the*  
301 *authors noted that RO<sub>2</sub>+RO<sub>2</sub> reaction is negligible in this study to start with. Please reconcile these*  
302 *seemingly contradictory statements. Also, can be suppressed nucleation under high NO<sub>x</sub> due to the*  
303 *higher volatility of organic nitrates as compared to peroxides (from RO<sub>2</sub>+HO<sub>2</sub>)?*

304 **Response:**

305 The compounds responsible for nucleation only account for a very small fraction of RO<sub>2</sub> reaction  
306 products. Although the contribution of RO<sub>2</sub>+RO<sub>2</sub> reaction to the total RO<sub>2</sub> loss is negligible, it can  
307 contribute a lot to the compounds responsible for nucleation because RO<sub>2</sub>+RO<sub>2</sub> reactions form dimers,  
308 which have high molecular weight and extremely low volatility (Ehn et al., 2014; Kirkby et al., 2016).  
309 Generally, organic nitrates are not expected to be the main compounds responsible for nucleation  
310 since their volatility is not low enough to nucleate, nor primary organic peroxides (from  
311 RO<sub>2</sub>(C<sub>10</sub>)+HO<sub>2</sub>). Therefore, although under high NO<sub>x</sub> more organic nitrates were found, organic  
312 nitrates are unlikely to be the reason for the suppressed nucleation.

313 *9. Line 205-206. There is nucleation (from organics) in the presence of NO<sub>x</sub> as shown in Fig. 4. In*  
314 *this sense, “absence of nucleation” here is a bit confusing. Perhaps would be clearer to say “absence*  
315 *of seed particles”.*

316 **Response:**

317 In the revised manuscript, we have modified “absence of nucleation” as follows.

318 “Because NO<sub>x</sub> suppressed new particle formation, the suppression of the SOA yield could be  
319 attributed to the lack of new particles as seed and thus the lack of condensational sink, or to the  
320 decrease of condensable organic materials.”

321 *10. Line 211 and Figure 3. The author concluded that the suppression effect of NO<sub>x</sub> on SOA yields*  
322 *was mainly due to suppression of nucleation, i.e., to the absence of particle surface as condensation*  
323 *sink. Many critical aspects are not discussed, making this conclusion not well-justified and*

324 *well-supported.*

325 *a. If the absence of seed particle surface area is the reason for the low yield under high NO<sub>x</sub>*  
326 *condition (at low SO<sub>2</sub>), this will point to the importance of loss of semivolatile species via chemical*  
327 *reactions or chamber wall loss (Kroll et al., ES&T, 2007). However, the effect of vapor wall loss in*  
328 *not considered in this study. Zhang et al. (PNAS, 2014) first systematically investigated the effects of*  
329 *particle surface area and vapor wall loss on SOA yields. For  $\alpha$ -pinene photooxidation and ozonolysis*  
330 *specifically, it was found that SOA yields are largely independent of seed surface area (McVay et al.,*  
331 *2016, Nah et al., ACP, 2016; Nah et al., ACP, 2017). Therefore, taken all these together, it is not*  
332 *clear how the absence of particle surface area can explain the suppressed SOA yields under high NO<sub>x</sub>*  
333 *condition in this study.*

334 **Response:**

335 Please refer to our response to a similar comment above (Pg. 2, lines 58-66).

336 *b. The authors dismissed the “decrease of condensable organic materials” in high NO<sub>x</sub> conditions as*  
337 *an explanation for the observed decrease in yield. Why? If more volatile organic nitrates are formed*  
338 *in high NO<sub>x</sub> conditions, why can’t this be an explanation for the suppressed SOA yield? For limonene*  
339 *data (Line 213-218), the authors appeared to embrace the role of volatility of oxidation products.*

340 **Response:**

341 In our study, when new particle formation was already enhanced by added SO<sub>2</sub>, the SOA yield at high  
342 NO<sub>x</sub> was comparable to that at low NO<sub>x</sub> for  $\alpha$ -pinene and the difference in SOA yield between high  
343 NO<sub>x</sub> and low NO<sub>x</sub> was much smaller (Fig. 3a). If the organic materials such as organic nitrate formed  
344 in high NO<sub>x</sub> conditions were more volatile, the SOA yield in high NO<sub>x</sub> should be low regardless of  
345 SO<sub>2</sub> concentration unless in addition to that, SO<sub>2</sub> enhanced the SOA yield at high NO<sub>x</sub> via the  
346 influence other than surface area effect, e.g., acidity effect. Organic nitrates formed at high NO<sub>x</sub> was  
347 proposed to be more volatile (Presto et al., 2005; Kroll et al., 2006). However, many organic nitrate  
348 formed in our study is highly oxidized organic molecule (HOMs) containing multi-functional groups  
349 besides nitrate (C<sub>7-10</sub>H<sub>9-15</sub>NO<sub>8-15</sub>). The compounds are expected to have low volatility and they were  
350 found to have an uptake coefficient on particles of ~1 (Pullinen et al. in preparation). A recent study  
351 also implied that organic nitrate may have low volatility (Hakkinen et al., 2012). Therefore, the  
352 suppressing effect of NO<sub>x</sub> on SOA yield was more likely due to suppressed nucleation, i.e., to lack of  
353 particle surface as condensational sinks.

354 In the revised manuscript, we have elaborated our discussion.

355 “This finding can be attributed to two possible explanations. Firstly, NO<sub>x</sub> did not significantly  
356 suppress the formation of low volatile condensable organic materials, although NO<sub>x</sub> obviously  
357 suppressed the formation of products for nucleation. Secondly, NO<sub>x</sub> did suppress the formation of  
358 low-volatility condensable organic materials via forming potentially more volatile compounds and in  
359 addition to that, the suppressed formation of condensable organic materials was compensated by the

360 presence of SO<sub>2</sub>, resulting in comparable SOA yield. Organic nitrates are a group of compounds  
361 formed at high NO<sub>x</sub>, which have been proposed to be more volatile (Presto et al., 2005; Kroll et al.,  
362 2006). However, many organic nitrates formed by photooxidation in this study were highly oxidized  
363 organic molecules (HOMs) containing multi-functional groups besides nitrate group  
364 (C<sub>7-10</sub>H<sub>9-15</sub>NO<sub>8-15</sub>). These compounds are expected to have low volatility and they are found to have an  
365 uptake coefficient on particles of ~1 (Pullinen et al., in preparation). Therefore, the suppressing  
366 effect of NO<sub>x</sub> on SOA yield was **mostly likely** due to suppressed nucleation, i.e., **the lack** of particle  
367 surface as condensational sink.”

368 For limonene data, please refer to our response to the comment below (“detailed comments” 10c).

369 *c. Line 217. How does the different range in VOC/NO<sub>x</sub> for  $\alpha$ -pinene and limonene experiments*  
370 *explain the differences in yields in high SO<sub>2</sub> conditions? Please elaborate and explain clearly.*

371 **Response:**

372 The cause of the difference between the  $\alpha$ -pinene and limonene cases is unknown for the moment and  
373 it would be pure speculation when discussing reasons for this difference. Therefore, in the revised  
374 manuscript, we only state that the reason is unknown so far and as possible explanation, we note that  
375 the average volatility of limonene oxidation products may be higher at higher NO<sub>x</sub>.

376 In the revised manuscript, we have revised this sentence as follows.

377 “**The cause of this difference is currently unknown. Our data of SOA yield suggest that the products**  
378 **formed from limonene oxidation at high NO<sub>x</sub> seemed to have higher average volatility than that at low**  
379 **NO<sub>x</sub>.**”

380 *11. Line 225-237. Comparisons with previous studies. Many critical details are not considered and*  
381 *discussed. I think the authors jumped to the conclusion on whether their study agree/disagree with*  
382 *previous studies too quickly.*

383 *a. Line 225. This sentence is only true for  $\alpha$ -pinene data in this study, but not for limonene. Please*  
384 *state clearly.*

385 **Response:**

386 In the revised manuscript, we have revised this sentence as follows.

387 “Our finding that **the difference in SOA yield between high NO<sub>x</sub> and low NO<sub>x</sub> conditions was highly**  
388 **reduced at high SO<sub>2</sub>** is also in line with the findings of some previous studies using seed aerosols  
389 (Sarrafzadeh et al., 2016; Eddingsaas et al., 2012a).”

390 *b. Seed particles were generated via SO<sub>2</sub> oxidation in this study (for high SO<sub>2</sub> experiments).*

391 *Previous studies directly injected seeds into the chamber. In comparing SOA yields, the author should*  
392 *also consider the role of gas-phase chemistry and particle phase chemistry. For instance, what about*  
393 *the reaction of SO<sub>2</sub> and criegee intermediates? What about the effect of particle acidity on*  
394 *particle-phase reactions (in this study vs. previous studies)? Please discuss.*

395 **Response:**

396 In our study, the reaction of SO<sub>2</sub> with Criegee intermediates was not important to the formation of  
397 oxidized organics and SOA formation for the following reasons. 1) The reaction of VOC with O<sub>3</sub> only  
398 contributed to a small fraction of VOC loss in this study and thus formation of Criegee intermediates  
399 was not significant. 2) At the water vapor concentration of this study, water may compete for Criegee  
400 intermediates with SO<sub>2</sub> to a large extent.

401 Particle acidity may affect the SOA yield via acid-catalyzed reactions, as we had discussed in our  
402 manuscript. In the revised manuscript, we have elaborated this discussion by comparing with previous  
403 studies as follows.

404 “Particle acidity may also play a role in affecting the SOA yield in the experiments with high SO<sub>2</sub>.  
405 Particle acidity was found to enhance the SOA yield from  $\alpha$ -pinene photooxidation at high NO<sub>x</sub>  
406 (Offenberg et al., 2009) and “high NO” conditions (Eddingsaas et al., 2012a). Yet, in low NO<sub>x</sub>  
407 condition, particle acidity was reported to have no significant effect on the SOA yield from  $\alpha$ -pinene  
408 photooxidation (Eddingsaas et al., 2012a; Han et al., 2016). According to these findings, at low NO<sub>x</sub>  
409 the enhancement of SOA yield in this study is attributed to the effect of facilitating nucleation and  
410 providing more particle surface by SO<sub>2</sub> photooxidation. At high NO<sub>x</sub>, the effect in enhancing new  
411 particle formation by SO<sub>2</sub> photooxidation seems to be more important, although the effect of particle  
412 acidity resulted from SO<sub>2</sub> photooxidation may also play a role.”

413 *c. The experiments in this study were conducted in the presence of humidity but previous studies were*  
414 *mostly conducted under dry conditions. RH can affect gas-phase and particle-phase chemistry, and*  
415 *subsequently SOA yields.*

416 **Response:**

417 We agree with the reviewer that RH can affect gas-phase and particle-phase chemistry and thus may  
418 also affect SOA yield. Because humidity is ubiquitous in the real atmosphere, we conducted our  
419 experiments in the presence of humidity in order to better represent ambient conditions. In the revised  
420 manuscript, we have emphasized this point.

421 “RH of this study is different from many previous studies, which often used very low RH (<10%).”

422 *d. The authors noted that the finding that SOA yields at high NO<sub>x</sub> is comparable to that at low NO<sub>x</sub> in*  
423 *high SO<sub>2</sub> conditions is in line with findings in Sarrafzadeh et al. (2016) and Eddingsaas et al. (2012a).*  
424 *I do not think that the data in Eddingsaas et al. showed that “in presence of seed aerosol, the*  
425 *difference in the SOA yield between low and high NO<sub>x</sub> is much reduced”. SOA yield is also a function*  
426 *of deltaMo. Considering the data in Table 1 of Eddingsaas et al., the difference in yields between low*  
427 *and high NO experiments for nucleation is 19%, and for seeded experiments are 15% and 10%.*

428 *However, the difference in deltaMo for the nucleation experiments is also the largest and this will*  
429 *play a role in the yield difference.*

430 **Response:**

431 As the reviewer noticed, the data in Eddingsaas et al. (2012) showed that in the absence of seed

432 aerosol SOA yield at low NO<sub>x</sub> is 2.5 times higher than that at high NO<sub>x</sub>, while in the presence of seed  
433 aerosol SOA yield at low NO<sub>x</sub> is only 1 and 0.6 times higher than that at high NO<sub>x</sub> for neutral seed  
434 and acid seed, respectively. Therefore, the data in Eddingsaas et al. (2012) did show that “in presence  
435 of seed aerosol, the difference in the SOA yield between low and high NO<sub>x</sub> is much reduced”.

436 We noticed that in the data given by Eddingsaas et al. (2012) the difference in deltaM<sub>0</sub> for nucleation  
437 experiments is the largest, which plays a role in SOA yield. However, the large difference in deltaM<sub>0</sub>  
438 between high NO<sub>x</sub> and low NO<sub>x</sub> cases is because the deltaM<sub>0</sub> at high NO<sub>x</sub> is the lowest in absence of  
439 seed, much lower than deltaM<sub>0</sub> in presence of seed when other conditions are largely the same. The  
440 higher deltaM<sub>0</sub> and the smaller difference in deltaM<sub>0</sub> between low NO<sub>x</sub> and high NO<sub>x</sub> in presence of  
441 seed also originated from the seed aerosol since other conditions were kept constant. This result  
442 agrees with our finding that “in presence of seed aerosol, the difference in the SOA yield between low  
443 and high NO<sub>x</sub> is much reduced”.

444 *e. The SOA yields in this study are much lower than previous studies, why? Considering the low NO<sub>x</sub>*  
445 *low SO<sub>2</sub> experiment, with OH dose of 1e11 molecules cm<sup>-3</sup> s, the yield in this study is 7%. However,*  
446 *the corresponding yield in Eddingsaas et al. is > 30% (Figure 3 of Eddingsaas et al.).*

447 **Response:**

448 The difference in SOA yield between this study and the study by Eddingsaas et al. (2012) can be  
449 explained by several reasons. Firstly, SOA yield in this study was calculated using a density of 1 g  
450 cm<sup>-3</sup> while in Eddingsaas et al. (2012) SOA yield was calculated using a density of 1.32 g cm<sup>-3</sup>.  
451 Secondly, reaction conditions such as VOC concentrations, NO<sub>x</sub> concentrations, and OH source and  
452 concentrations of our study at low NO<sub>x</sub> are different from those in Eddingsaas et al. (2012). For  
453 example, in our study at low NO<sub>x</sub>, RO<sub>2</sub>+NO account for a large fraction of RO<sub>2</sub> loss while in  
454 Eddingsaas et al. (2012) RO<sub>2</sub>+HO<sub>2</sub> is the dominant pathway of RO<sub>2</sub> loss. These differences in reaction  
455 conditions may affect SOA yield. Thirdly, the organic aerosol concentration of this study is much  
456 lower than that in Eddingsaas et al. (2012). Fourthly, the total particle surface area may be different  
457 from Eddingsaas et al. (2012) (the data are not available to compare with), which can also affect the  
458 measured SOA yield. Also note that the exceptionally high SOA yield at lower α-pinene  
459 concentration is an “outlier” to other data in Eddingsaas et al. (2012) and could not be explained by  
460 the authors.

461 In the revised manuscript, we have added the following discussion regarding the comparison of SOA  
462 yield from α-pinene photooxidation with the literature.

463 “The reaction conditions of this study often differ from those described in the literature (see Table  
464 S2).

465 The difference in these conditions can result in both different apparent dependence on specific  
466 parameters and the varied SOA yield. For example, SOA yield from α-pinene photooxidation at low  
467 NO<sub>x</sub> in this study appeared to be much lower than that in Eddingsaas et al. (2012a). The difference

468 between the SOA yield in this study and some of previous studies and between the values in the  
469 literature can be attributed to several reasons: 1) RO<sub>2</sub> fates may be different. For example, in our study  
470 at low NO<sub>x</sub>, RO<sub>2</sub>+NO account for a large fraction of RO<sub>2</sub> loss while in Eddingsaas et al. (2012a)  
471 RO<sub>2</sub>+HO<sub>2</sub> is the dominant pathway of RO<sub>2</sub> loss. This difference in RO<sub>2</sub> fates may affect oxidation  
472 products distribution. 2) The organic aerosol loading of this study is much lower than that some of  
473 previous studies (e.g., Eddingsaas et al. (2012a)) (see Fig. S9). SOA yields in this study were also  
474 plotted versus organic aerosol loading to better compare with previous studies (Fig. S8 and S9). 3)  
475 The total particle surface area in this study may also differ from previous studies, which may  
476 influence the apparent SOA yield due to vapor wall loss (the total particle surface area is often not  
477 reported in many previous studies to compare with). 4) RH of this study is different from many  
478 previous studies, which often used very low RH (<10%). It is important to emphasize that reaction  
479 conditions including the NO<sub>x</sub> as well as SO<sub>2</sub> concentration range and RH in this study were chosen to  
480 be relevant to the anthropogenic-biogenic interactions in the ambient atmosphere. In addition,  
481 difference in the organic aerosol density used in yield calculation should be taken into account. In this  
482 study, SOA yield was derived using a density of 1 g cm<sup>-3</sup> to better compare with many previous  
483 studies (e.g., (Henry et al., 2012)), while in some other studies SOA yield was derived using different  
484 density (e.g., 1.32 g cm<sup>-3</sup> in Eddingsaas et al. (2012a)).”

485 In the revised manuscript, we have also added a figure plotting SOA yield as a function of organic  
486 aerosol mass loading (Fig. S8).

487 *12. Line 238 onwards, effect of SO2.*

488 *a. One of the proposed reasons to explain the effect of SO2 is that it induces nucleation and provides*  
489 *more particle surface area for condensation. Again, if this is the case, it will point to the importance*  
490 *of loss of organic vapors to chamber walls, though previous studies suggested that this process does*  
491 *not effect SOA yields from α-pinene oxidations to a large extent. With this, it is not clear if this is*  
492 *indeed a reason for the observed SO2 effect. Please explain.*

493 **Response:**

494 Please refer to our response to the similar comments above (Pg. 2, lines 58-66; Pg. 4, lines 119-123)  
495 and corresponding revisions to the manuscript.

496 *b. Line 258. Is “counterbalance” the appropriate word? If the suppression effect of NOx is*  
497 *counterbalanced by the enhancement effect SO2, in going from “low NOx low SO2” to “high NOx*  
498 *high SO2” one shall not observe change in SOA yields? Also, note that the limonene data showed*  
499 *very different trends comparing to the α-pinene data. This needs to be accurately and clearly stated.*

500 **Response:**

501 We have changed “counterbalance” to “compensated”. The revised sentence is as follows.

502 “The presence of high SO<sub>2</sub> enhanced the SOA mass yield at high NO<sub>x</sub> conditions, which was even  
503 comparable with the SOA yield at low NO<sub>x</sub> for α-pinene oxidation. This finding indicates that the

504 suppressing effect of NO<sub>x</sub> on SOA mass formation was compensated to large extent by the presence  
505 of SO<sub>2</sub>.”

506 As for the difference in the limonene and  $\alpha$ -pinene data, please refer to our response to the similar  
507 comments above (Pg. 1, lines 35-43) and our corresponding revisions to the manuscript.

508 *13. Line 315-318. This explanation is a stretch and not well-justified. There is extensive fragmentation*  
509 *in the AMS and so the H/C ratios of oxidation product molecules do not necessarily translate to the*  
510 *H/C ratios measured. As shown in Chhabra et al., not all experiments conducted under low NO<sub>x</sub>*  
511 *condition have higher H/C ratios.*

512 **Response:**

513 In our opinion, the reaction pathway of RO<sub>2</sub> at least provides a likely explanation for the difference in  
514 H/C at different NO<sub>x</sub>. Although there is extensive fragmentation in the AMS, H/C measured generally  
515 reflects the H/C ratios of the overall compounds. In addition, as we discussed, Chhabra et al. (2011)’s  
516 data also show that for  $\alpha$ -pinene photooxidation, SOA formed at high NO<sub>x</sub> generally has lower H/C,  
517 consistent with our study. Admittedly, the RO<sub>2</sub> reaction pathway is not the only factor affecting H/C  
518 and O/C. Other factors such as VOC identity, oxidants, and reaction mechanisms, including various  
519 functionalization, fragmentation, and oligomerization in both the gas phase and particle phase also  
520 play important roles in the chemical composition and thus H/C and O/C. We did not intend to apply  
521 our explanation here to all other reaction systems.

522 *14. Line 262 onwards. Did the ratio of nitrate mass concentration to organics mass change over*  
523 *time?*

524 **Response:**

525 The ratio of nitrate mass concentration to organics gradually decreased in the beginning of the  
526 reactions (2-3 h) and then leveled off. Also, note that in the very beginning of a reaction, the data have  
527 large uncertainties due to the low concentration of nitrate and organics. In our manuscript, the average  
528 ratios were used to compare different experiments. In the revised manuscript, we have clearly  
529 described this in the captions of Fig. 4.

530 “The average ratios of nitrate to organics during the reaction are shown and error bars indicate the  
531 standard deviations.”

532 Minor comments

533 *1. Line 72. Why “in contrast”?*

534 **Response:**

535 The finding here is different from those in the studies discussed before. In the revised manuscript, we  
536 have modified this sentence as follows.

537 “In contrast, Eddingsaas et al. (2012a) found that particle yield increases with aerosol acidity only in  
538 “high NO” condition (NO<sub>x</sub> 800 ppb,  $\alpha$ -pinene: 20-52 ppb), but is independent of the presence of seed  
539 aerosol or aerosol acidity in both “high NO<sub>2</sub>” condition (NO<sub>x</sub> 800 ppb)” and low NO<sub>x</sub> (NO<sub>x</sub> lower than

540 the detection limit of the NO<sub>x</sub> analyzer).”

541 2. Line 84 citation. There are more studies on OH oxidations of  $\alpha$ -pinene and they should also be  
542 cited here (for example, some of the studies cited in page 2).

543 **Response:**

544 In the revised manuscript, we have added more studies on OH oxidation of  $\alpha$ -pinene. However, we  
545 would like to note here that many studies on  $\alpha$ -pinene photooxidation did not quantitatively  
546 distinguish the contributions of oxidation by OH and by O<sub>3</sub>.

547 3. Line 125. “mass” should be “volume”? SMPS measures volume concentration.

548 **Response:**

549 We have changed the “mass” to “volume” in the revised manuscript.

550 4. Line 126. Delete “with”.

551 **Response:**

552 Done.

553 5. Line 256. Sentence not clear.

554 **Response:**

555 This sentence has been revised as follows.

556 “The presence of high SO<sub>2</sub> enhanced the SOA mass yield at high NO<sub>x</sub> conditions, which was even  
557 comparable with the SOA yield at low NO<sub>x</sub> for  $\alpha$ -pinene oxidation. This finding indicates that the  
558 suppressing effect of NO<sub>x</sub> on SOA mass formation was compensated to large extent by the presence  
559 of SO<sub>2</sub>.”

560 6. Figure 1 caption should specify the SO<sub>2</sub> condition.

561 **Response:**

562 Done.

563 **References**

- 564 Bahreini, R., Keywood, M. D., Ng, N. L., Varutbangkul, V., Gao, S., Flagan, R. C., Seinfeld,  
565 J. H., Worsnop, D. R., and Jimenez, J. L.: Measurements of secondary organic aerosol from  
566 oxidation of cycloalkenes, terpenes, and m-xylene using an Aerodyne aerosol mass  
567 spectrometer, *Environ. Sci. Technol.*, 39, 5674-5688, 10.1021/es048061a, 2005.
- 568 Berndt, T., Richters, S., Kaethner, R., Voigtlander, J., Stratmann, F., Sipila, M., Kulmala, M.,  
569 and Herrmann, H.: Gas-Phase Ozonolysis of Cycloalkenes: Formation of Highly Oxidized  
570 RO<sub>2</sub> Radicals and Their Reactions with NO, NO<sub>2</sub>, SO<sub>2</sub>, and Other RO<sub>2</sub> Radicals, *J. Phys.*  
571 *Chem. A* 119, 10336-10348, 10.1021/acs.jpca.5b07295, 2015.
- 572 Chhabra, P. S., Ng, N. L., Canagaratna, M. R., Corrigan, A. L., Russell, L. M., Worsnop, D.  
573 R., Flagan, R. C., and Seinfeld, J. H.: Elemental composition and oxidation of chamber  
574 organic aerosol, *Atmos. Chem. Phys.*, 11, 8827-8845, 10.5194/acp-11-8827-2011, 2011.
- 575 Eddingsaas, N. C., Loza, C. L., Yee, L. D., Chan, M., Schilling, K. A., Chhabra, P. S.,  
576 Seinfeld, J. H., and Wennberg, P. O.: alpha-pinene photooxidation under controlled chemical  
577 conditions - Part 2: SOA yield and composition in low- and high-NO<sub>x</sub> environments, *Atmos.*  
578 *Chem. Phys.*, 12, 7413-7427, 10.5194/acp-12-7413-2012, 2012.
- 579 Ehn, M., Thornton, J. A., Kleist, E., Sipila, M., Junninen, H., Pullinen, I., Springer, M.,  
580 Rubach, F., Tillmann, R., Lee, B., Lopez-Hilfiker, F., Andres, S., Acir, I. H., Rissanen, M.,  
581 Jokinen, T., Schobesberger, S., Kangasluoma, J., Kontkanen, J., Nieminen, T., Kurten, T.,  
582 Nielsen, L. B., Jorgensen, S., Kjaergaard, H. G., Canagaratna, M., Dal Maso, M., Berndt, T.,  
583 Petaja, T., Wahner, A., Kerminen, V. M., Kulmala, M., Worsnop, D. R., Wildt, J., and  
584 Mentel, T. F.: A large source of low-volatility secondary organic aerosol, *Nature*, 506,  
585 476-479, 10.1038/nature13032, 2014.
- 586 Farmer, D. K., Matsunaga, A., Docherty, K. S., Surratt, J. D., Seinfeld, J. H., Ziemann, P. J.,  
587 and Jimenez, J. L.: Response of an aerosol mass spectrometer to organonitrates and  
588 organosulfates and implications for atmospheric chemistry, *Proc. Nat. Acad. Sci. U.S.A.*, 107,  
589 6670-6675, 10.1073/pnas.0912340107, 2010.
- 590 Flores, J. M., Zhao, D. F., Segev, L., Schlag, P., Kiendler-Scharr, A., Fuchs, H., Watne, A. K.,  
591 Bluvshstein, N., Mentel, T. F., Hallquist, M., and Rudich, Y.: Evolution of the complex  
592 refractive index in the UV spectral region in ageing secondary organic aerosol, *Atmos. Chem.*  
593 *Phys.*, 14, 5793-5806, 10.5194/acp-14-5793-2014, 2014.
- 594 Friedman, B., Brophy, P., Brune, W. H., and Farmer, D. K.: Anthropogenic Sulfur  
595 Perturbations on Biogenic Oxidation: SO<sub>2</sub> Additions Impact Gas-Phase OH Oxidation  
596 Products of alpha- and beta-Pinene, *Environ. Sci. Technol.*, 50, 1269-1279,  
597 10.1021/acs.est.5b05010, 2016.
- 598 Hakkinen, S. A. K., Aijala, M., Lehtipalo, K., Junninen, H., Backman, J., Virkkula, A.,  
599 Nieminen, T., Vestenius, M., Hakola, H., Ehn, M., Worsnop, D. R., Kulmala, M., Petaja, T.,  
600 and Riipinen, I.: Long-term volatility measurements of submicron atmospheric aerosol in

601 Hyytiälä, Finland, *Atmos. Chem. Phys.*, 12, 10771-10786, 10.5194/acp-12-10771-2012,  
602 2012.

603 Han, Y. M., Stroud, C. A., Liggitto, J., and Li, S. M.: The effect of particle acidity on  
604 secondary organic aerosol formation from alpha-pinene photooxidation under  
605 atmospherically relevant conditions, *Atmos. Chem. Phys.*, 16, 13929-13944,  
606 10.5194/acp-16-13929-2016, 2016.

607 Kirkby, J., Duplissy, J., Sengupta, K., Frege, C., Gordon, H., Williamson, C., Heinritzi, M.,  
608 Simon, M., Yan, C., Almeida, J., Tröstl, J., Nieminen, T., Ortega, I. K., Wagner, R., Adamov,  
609 A., Amorim, A., Bernhammer, A.-K., Bianchi, F., Breitenlechner, M., Brilke, S., Chen, X.,  
610 Craven, J., Dias, A., Ehrhart, S., Flagan, R. C., Franchin, A., Fuchs, C., Guida, R., Hakala, J.,  
611 Hoyle, C. R., Jokinen, T., Junninen, H., Kangasluoma, J., Kim, J., Krapf, M., Kürten, A.,  
612 Laaksonen, A., Lehtipalo, K., Makhmutov, V., Mathot, S., Molteni, U., Onnela, A., Peräkylä,  
613 O., Piel, F., Petäjä, T., Praplan, A. P., Pringle, K., Rap, A., Richards, N. A. D., Riipinen, I.,  
614 Rissanen, M. P., Rondo, L., Sarnela, N., Schobesberger, S., Scott, C. E., Seinfeld, J. H.,  
615 Sipilä, M., Steiner, G., Stozhkov, Y., Stratmann, F., Tomé, A., Virtanen, A., Vogel, A. L.,  
616 Wagner, A. C., Wagner, P. E., Weingartner, E., Wimmer, D., Winkler, P. M., Ye, P., Zhang,  
617 X., Hansel, A., Dommen, J., Donahue, N. M., Worsnop, D. R., Baltensperger, U., Kulmala,  
618 M., Carslaw, K. S., and Curtius, J.: Ion-induced nucleation of pure biogenic particles, *Nature*,  
619 533, 521-526, 10.1038/nature17953, 2016.

620 Kleindienst, T. E., Edney, E. O., Lewandowski, M., Offenber, J. H., and Jaoui, M.:  
621 Secondary organic carbon and aerosol yields from the irradiations of isoprene and  
622 alpha-pinene in the presence of NO<sub>x</sub> and SO<sub>2</sub>, *Environ. Sci. Technol.*, 40, 3807-3812,  
623 10.1021/es052446r, 2006.

624 Kroll, J. H., Ng, N. L., Murphy, S. M., Flagan, R. C., and Seinfeld, J. H.: Secondary organic  
625 aerosol formation from isoprene photooxidation, *Environ. Sci. Technol.*, 40, 1869-1877,  
626 10.1021/es0524301, 2006.

627 Lightfoot, P. D., Cox, R. A., Crowley, J. N., Destriau, M., Hayman, G. D., Jenkin, M. E.,  
628 Moortgat, G. K., and Zabel, F.: Organic peroxy-radicals - kinetics, spectroscopy and  
629 tropospheric chemistry, *Atmospheric Environment Part a-General Topics*, 26, 1805-1961,  
630 10.1016/0960-1686(92)90423-i, 1992.

631 McVay, R. C., Zhang, X., Aumont, B., Valorso, R., Camredon, M., La, Y. S., Wennberg, P.  
632 O., and Seinfeld, J. H.: SOA formation from the photooxidation of alpha-pinene: systematic  
633 exploration of the simulation of chamber data, *Atmos. Chem. Phys.*, 16, 2785-2802,  
634 10.5194/acp-16-2785-2016, 2016.

635 Nah, T., McVay, R. C., Zhang, X., Boyd, C. M., Seinfeld, J. H., and Ng, N. L.: Influence of  
636 seed aerosol surface area and oxidation rate on vapor wall deposition and SOA mass yields: a  
637 case study with alpha-pinene ozonolysis, *Atmos. Chem. Phys.*, 16, 9361-9379,  
638 10.5194/acp-16-9361-2016, 2016.

639 Ng, N. L., Chhabra, P. S., Chan, A. W. H., Surratt, J. D., Kroll, J. H., Kwan, A. J., McCabe,  
640 D. C., Wennberg, P. O., Sorooshian, A., Murphy, S. M., Dalleska, N. F., Flagan, R. C., and  
641 Seinfeld, J. H.: Effect of NO(x) level on secondary organic aerosol (SOA) formation from the  
642 photooxidation of terpenes, *Atmos. Chem. Phys.*, 7, 5159-5174, 2007.

643 Offenberg, J. H., Lewandowski, M., Edney, E. O., Kleindienst, T. E., and Jaoui, M.:  
644 Influence of Aerosol Acidity on the Formation of Secondary Organic Aerosol from Biogenic  
645 Precursor Hydrocarbons, *Environ. Sci. Technol.*, 43, 7742-7747, 10.1021/es901538e, 2009.

646 Presto, A. A., Hartz, K. E. H., and Donahue, N. M.: Secondary organic aerosol production  
647 from terpene ozonolysis. 2. Effect of NO<sub>x</sub> concentration, *Environ. Sci. Technol.*, 39,  
648 7046-7054, 10.1021/es050400s, 2005.

649 Rohrer, F., Bohn, B., Brauers, T., Bruning, D., Johnen, F. J., Wahner, A., and Kleffmann, J.:  
650 Characterisation of the photolytic HONO-source in the atmosphere simulation chamber  
651 SAPHIR, *Atmos. Chem. Phys.*, 5, 2189-2201, 2005.

652 Sarrafzadeh, M., Wildt, J., Pullinen, I., Springer, M., Kleist, E., Tillmann, R., Schmitt, S. H.,  
653 Wu, C., Mentel, T. F., Zhao, D. F., Hastie, D. R., and Kiendler-Scharr, A.: Impact of NO<sub>x</sub>  
654 and OH on secondary organic aerosol formation from beta-pinene photooxidation, *Atmos.*  
655 *Chem. Phys.*, 16, 11237-11248, 10.5194/acp-16-11237-2016, 2016.

656 Wennberg, P. O.: Let's abandon the "high NO<sub>x</sub>" and "low NO<sub>x</sub>" terminology, *IGAC News*,  
657 3-4, 2013.

658  
659
